# Supplementary material for: Nectin-4 cis-interacts with ErbB2 and its trastuzumab-resistant splice variants, enhancing their activation and DNA synthesis
Source: PubMed Central journal article supplement (PMC6908695; doi:10.1038/s41598-019-55460-9), 2019-12-12
Supplement: 41598_2019_55460_MOESM1_ESM.pdf [file 41598_2019_55460_MOESM1_ESM.pdf]

# **Nectin-4 *cis*-interacts with ErbB2 and its trastuzumab-resistant splice variants, enhancing their activation and DNA synthesis**

Shin Kedashiro, Ayumu Sugiura, Kiyohito Mizutani\*, and Yoshimi Takai\*

From the Division of Pathogenetic Signaling, Department of Biochemistry and Molecular Biology, Kobe University Graduate School of Medicine, 1-5-6 Minatojima-minamimachi, Chuo-ku, Kobe, Hyogo 650-0047, Japan

\*Corresponding author:

Yoshimi Takai (ytakai@med.kobe-u.ac.jp)

or

Kiyohito Mizutani (mizutani@med.kobe-u.ac.jp)

**Supplementary Figure 1:** Specific *cis*-interaction of nectin-4 with ErbB2.

**Supplementary Figure 2:** The *cis*-interaction of the third immunoglobulin-like domain of nectin-4 with domain IV of ErbB2.

**Supplementary Figure 3:** Inhibition of the *cis*-interaction of nectin-4 with ErbB2 by recombinant protein of the third immunoglobulin-like domain of nectin-4.

**Supplementary Figure 4:** The full-length blots of Figure 2.

**Supplementary Figure 5:** The full-length blots of Figure 3.

**Supplementary Figure 6:** The full-length blots of Figure 4a and Figure 4b.

**Supplementary Figure 7:** The full-length blots of Figure 4c.

**Supplementary Figure 8:** The full-length blots of Figure 6.

**Supplementary Figure 9:** The full-length blots of Figure 7.

**Supplementary Figure 10:** The full-length blots of Supplementary Figure 1.

**Supplementary Figure 11:** The full-length blots of Supplementary Figure 2.

**Supplementary Figure 12:** The full-length blots of Supplementary Figure 3.

**Supplementary Table 1:** The list of the reagents used in this study.

**Supplementary Table 2:** The list of the antibodies used in this study.

**Supplementary Table 3:** The list of the siRNA sequences used in this study.

**Supplementary Methods**

# Supplementary Figure 1

**a**

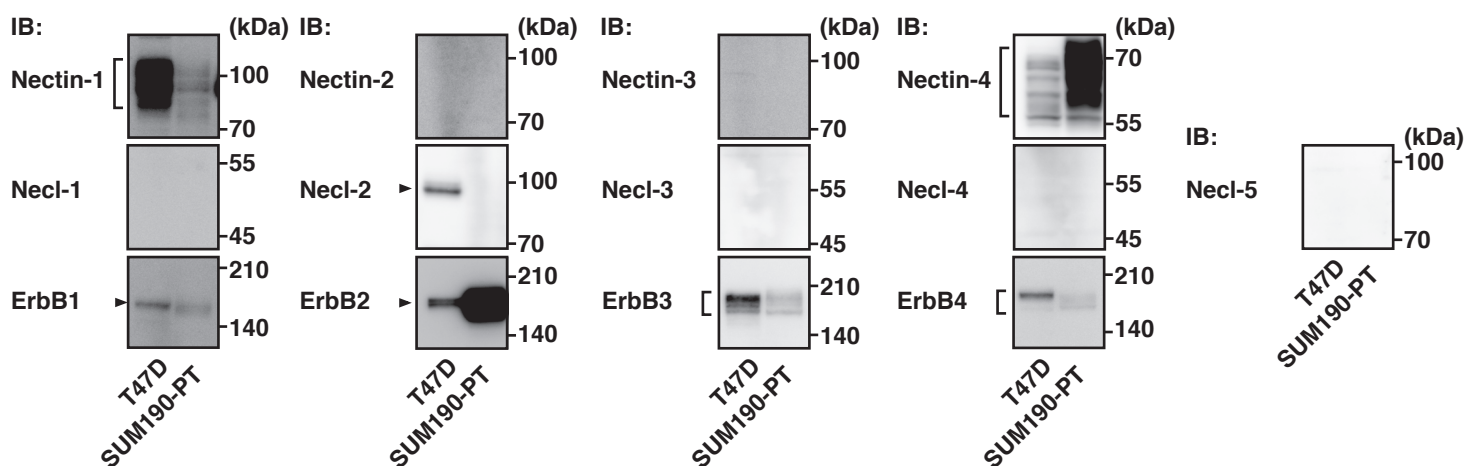

**b**

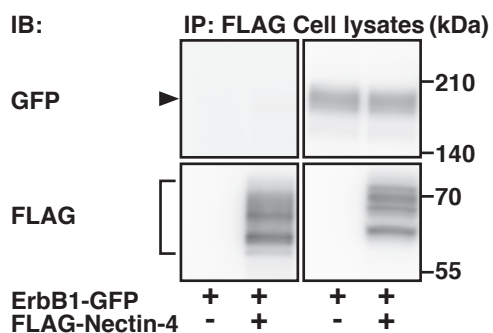

**c**

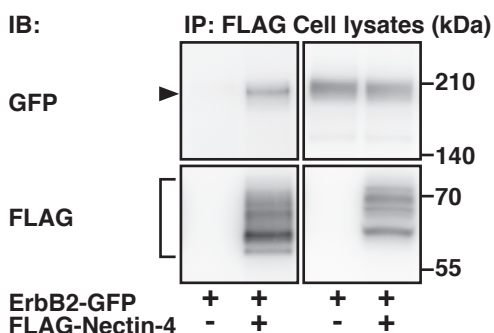

**d**

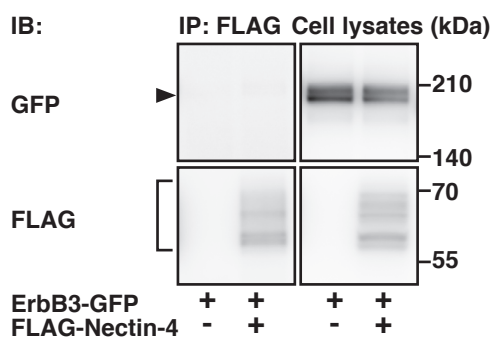

**e**

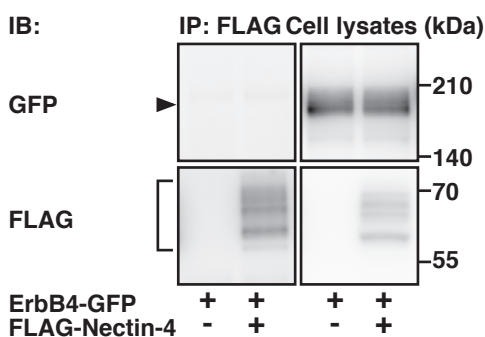

**f**

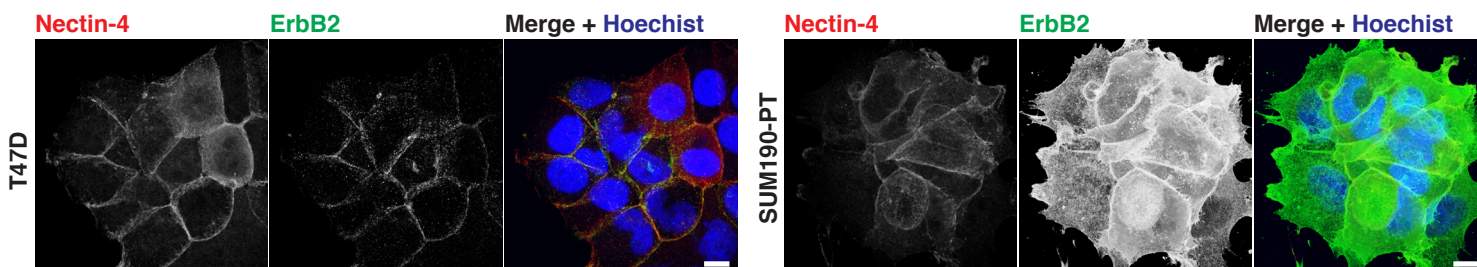

**Supplementary Figure 1. Specific *cis*-interaction of nectin-4 with ErbB2.** **a** Expression of nectin and ErbB family members. Lysates of T47D and SUM190-PT cells (20  $\mu$ g of each protein) were subjected to Western blotting using the indicated Abs. **b–e** Specific *cis*-interaction of nectin-4 with ErbB2. HEK293E cells were co-transfected with various combinations of the indicated plasmids and cultured in suspension. FLAG-tagged nectin-4 (FLAG-Nectin-4) was immunoprecipitated using anti-FLAG mAb, and samples were subjected to Western blotting using the indicated Abs. **f** Localization of nectin-4 and ErbB2 in T47D and SUM190-PT cells. Each of the cells were stained with the indicated Abs. Arrowheads and square brackets indicate each of the proteins. The displayed blots were cropped, and the full-length blots are shown in Supplementary Figure 10. Scale bars, 10  $\mu$ m. IB, immunoblotting; IP, immunoprecipitation. Representative results from three independent experiments are shown.

# Supplementary Figure 2

**a**

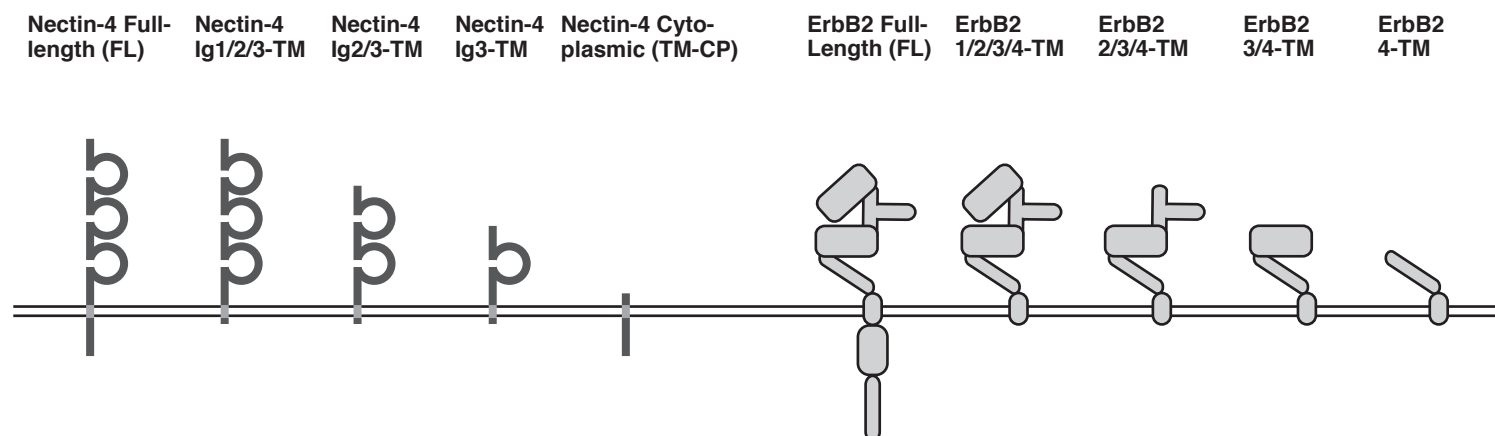

**b**

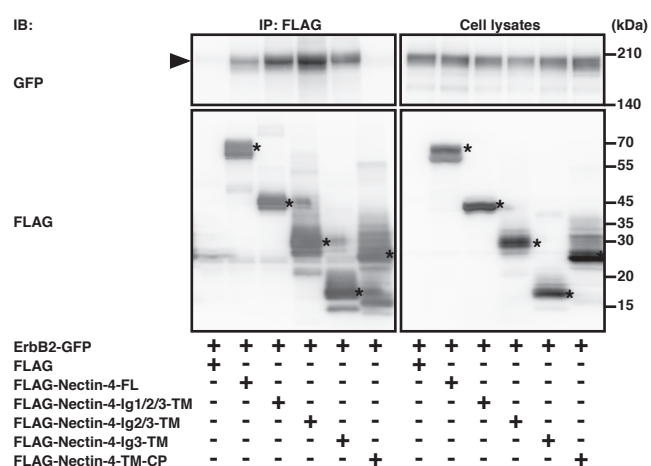

**c**

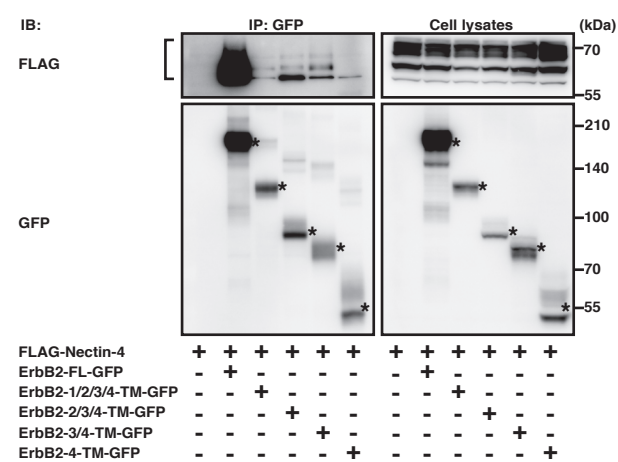

**d**

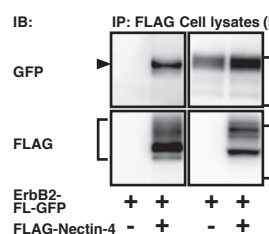

**e**

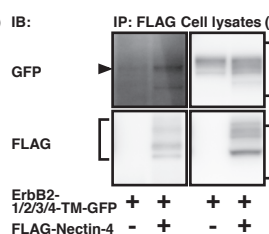

**f**

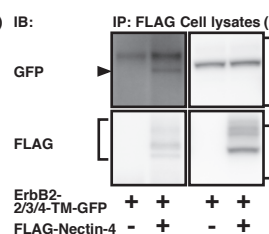

**g**

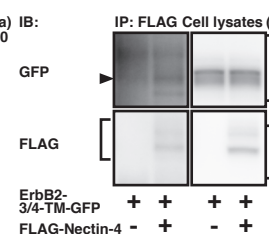

**h**

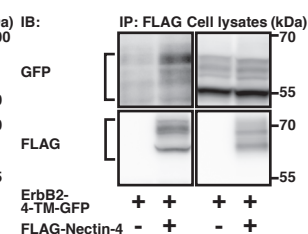

**Supplementary Figure 2. The *cis*-interaction of the third immunoglobulin-like domain of nectin-4 with domain IV of ErbB2.** **a** Schematic of nectin-4 mutants and ErbB2 mutants. **b** Identification of the interaction domain of nectin-4 with ErbB2. HEK293E cells were co-transfected with various combinations of the indicated plasmids and cultured in suspension. FLAG-tagged nectin-4 (FLAG-Nectin-4) and its immunoglobulin (Ig)-like domain deleted mutants were immunoprecipitated using the anti-FLAG mAb, and the samples were subjected to Western blotting using the indicated Abs. **c–h** Identification of the interaction domain of ErbB2 with nectin-4. HEK293E cells were co-transfected with various combinations of the indicated plasmids and cultured in suspension. GFP-tagged ErbB2 mutants were immunoprecipitated using the anti-GFP pAb (**c**). FLAG-Nectin-4 was immunoprecipitated using the anti-FLAG mAb (**d–h**). The samples were subjected to Western blotting using the indicated Abs. Arrowheads and square brackets indicate each of the protein. The displayed blots were cropped, and the full-length blots are shown in Supplementary Figure 11. Asterisks, nectin-4 mutants or ErbB2 mutants; IB, immunoblotting; IP, immunoprecipitation. Representative results from three independent experiments are shown.

# Supplementary Figure 3

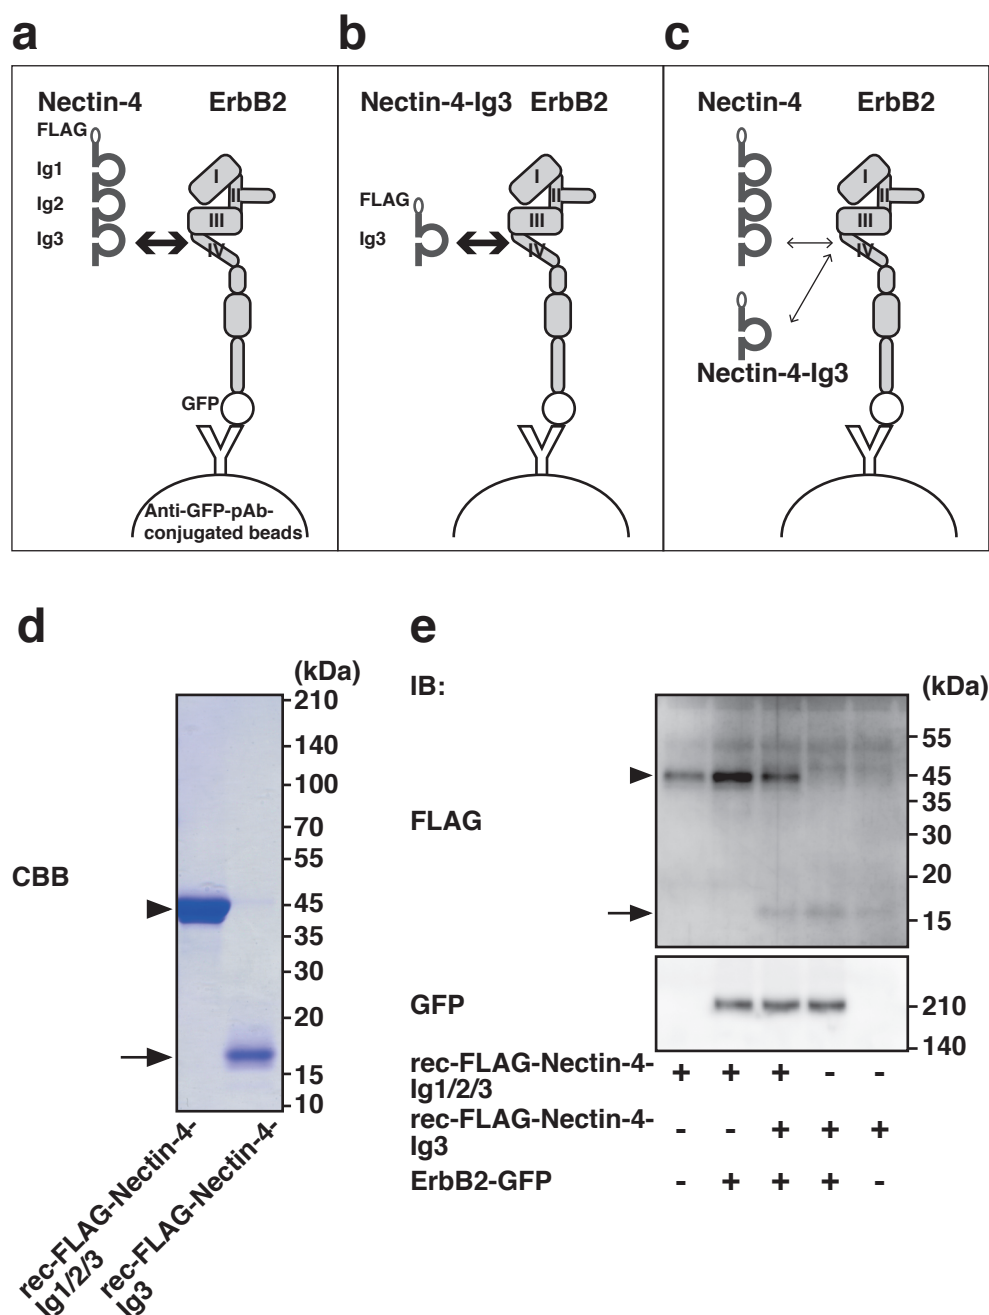

**Supplementary Figure 3. Inhibition of the *cis*-interaction of nectin-4 with ErbB2 by recombinant protein of the third immunoglobulin-like domain of nectin-4.** **a–c** Schematic diagram of the experimental design. **d** Purification of FLAG-tagged recombinant proteins of nectin-4. Recombinant FLAG-tagged extracellular region of nectin-4 (rec-FLAG-Nectin-4-Ig1/2/3) and recombinant FLAG-tagged third immunoglobulin (Ig)-like domain of nectin-4 (rec-FLAG-Nectin-4-Ig3) were prepared from HEK293E cells. The purified proteins (100 pmol of protein each) were analysed by SDS-PAGE with Coomassie brilliant blue (CBB) staining. **e** Inhibition of the *cis*-interaction of nectin-4 with ErbB2 by recombinant protein of the third Ig-like domain of nectin-4. ErbB2-GFP was immobilized on anti-GFP-Ab-conjugated beads. The beads were resuspended in PBS containing 5  $\mu$ M rec-FLAG-Nectin-4-Ig1/2/3 in the presence or absence of 25  $\mu$ M rec-FLAG-Nectin-4-Ig3 and incubated in a total volume of 20  $\mu$ l at 4°C for 16 h with gentle mixing. The beads were precipitated, and the samples were subjected to Western blotting using the indicated Abs. Arrowheads or arrows indicate the bands of rec-FLAG-nectin-4-Ig1/2/3 or rec-FLAG-Nectin-4-Ig3, respectively. The displayed blots were cropped, and the full-length blots are shown in Supplementary Figure 12. IB, immunoblotting. Representative results from three independent experiments are shown.

# Supplementary Figure 4

**a**

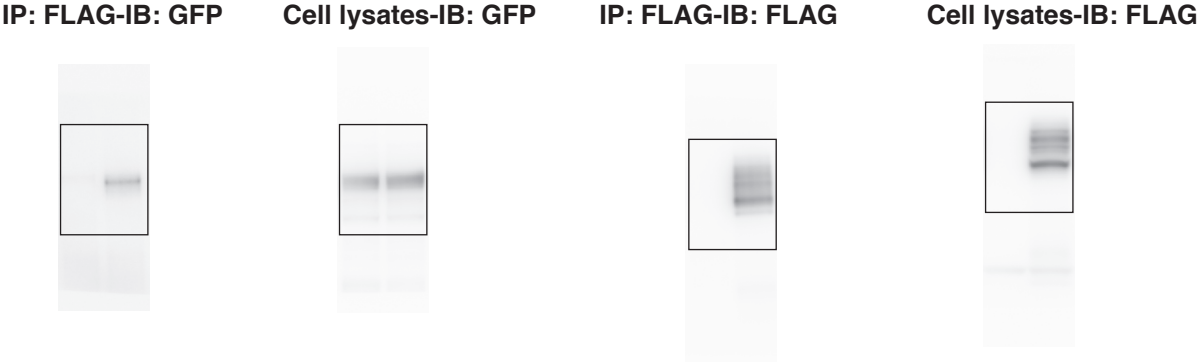

**b**

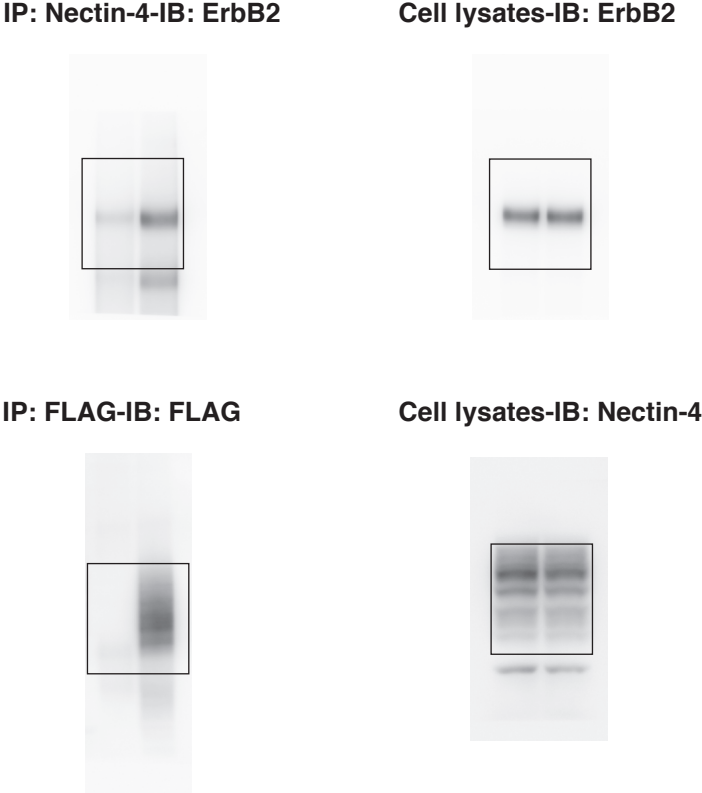

**Supplementary Figure 4. Full-length blots of Figure 2. a-b** full-length blots of Figure 2a-b, respectively. Boxed regions were cropped and shown as the figure.

# Supplementary Figure 5

**a**

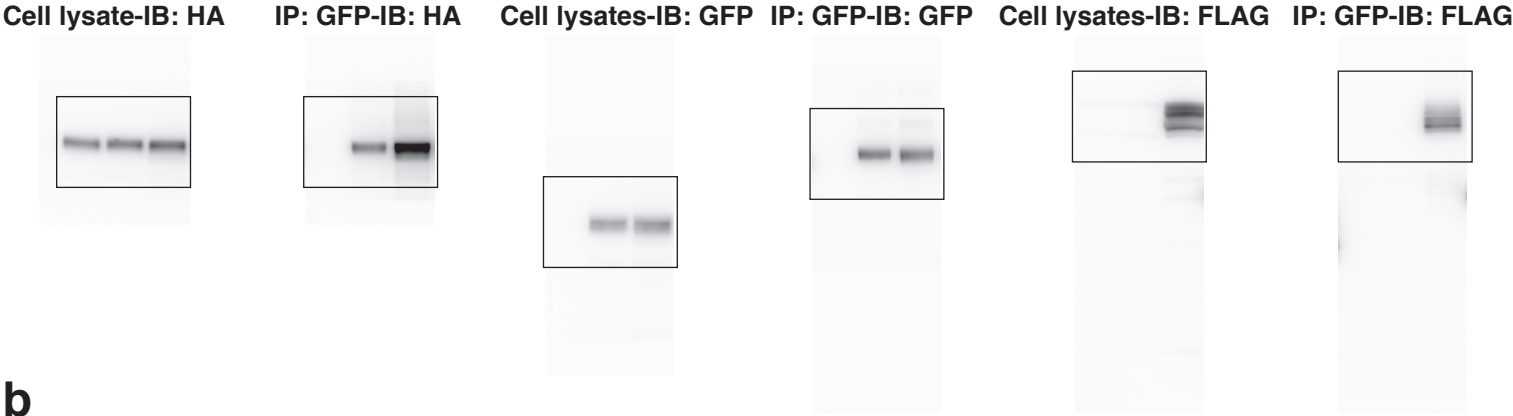

**b**

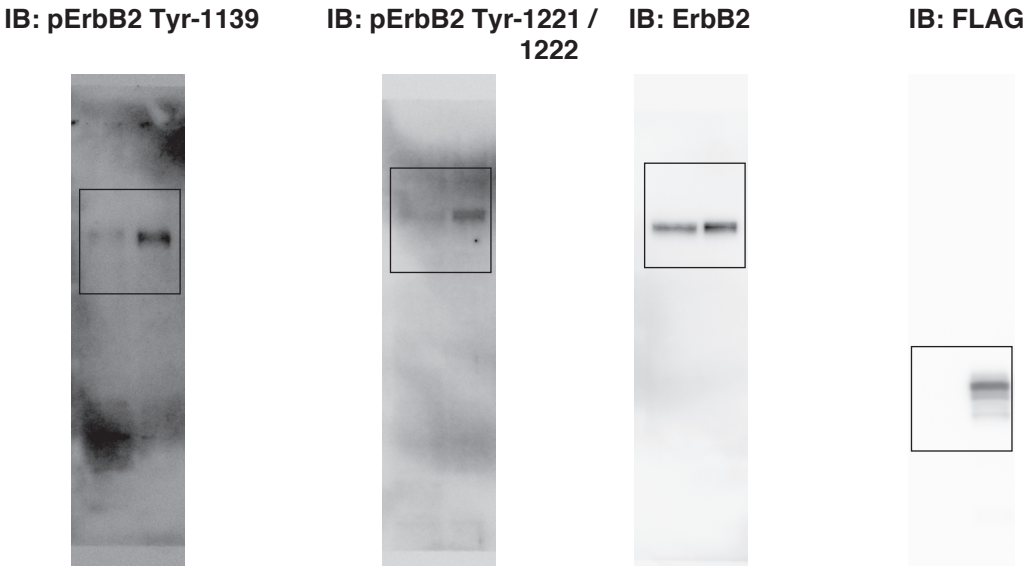

**c**

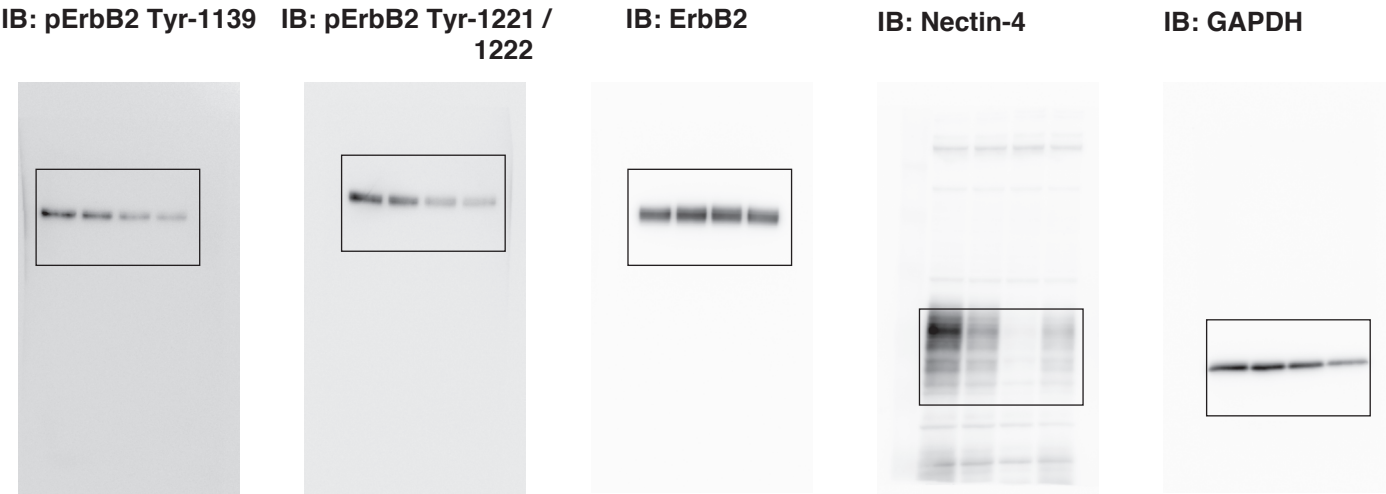

**Supplementary Figure 5. Full-length blots of Figure 3. a-c full-length blots of Figure 3a-c, respectively. Boxed regions were cropped and shown as the figure.**

# Supplementary Figure 6

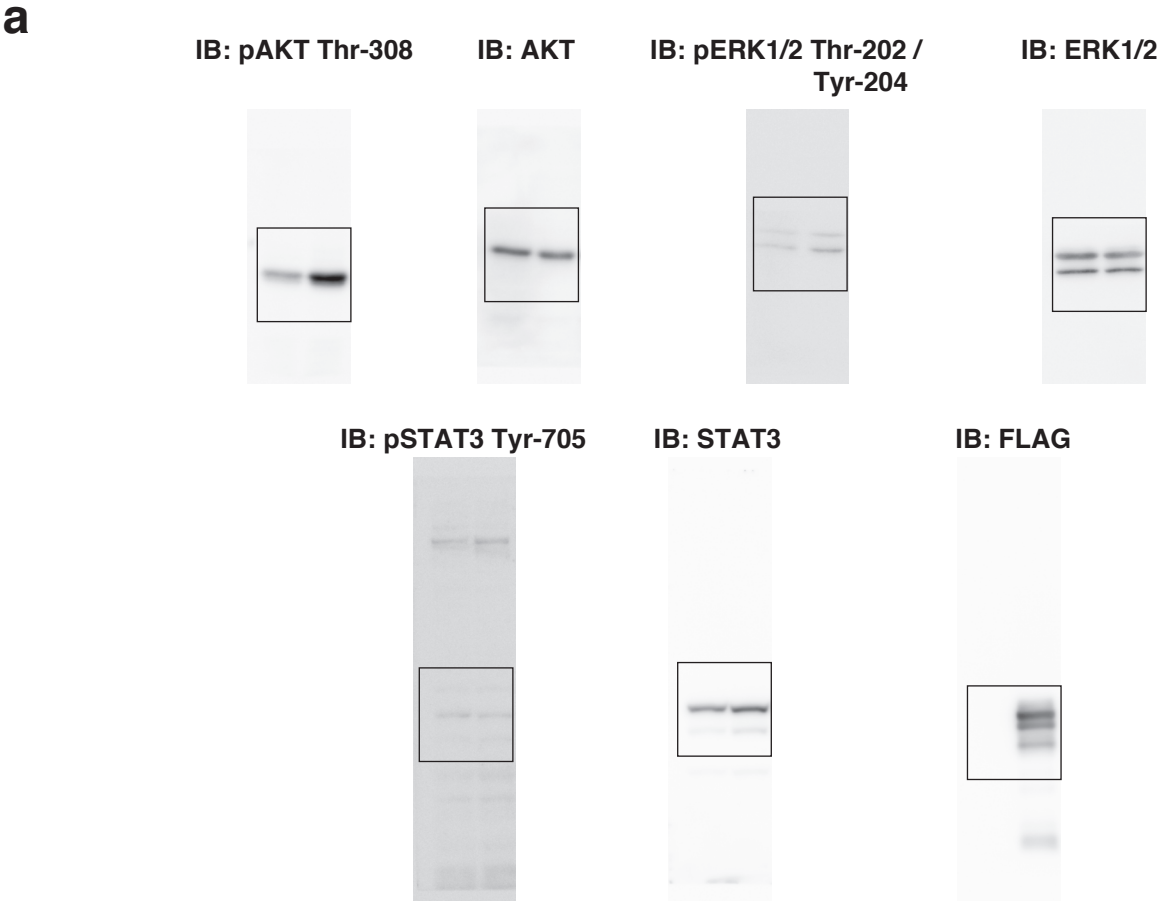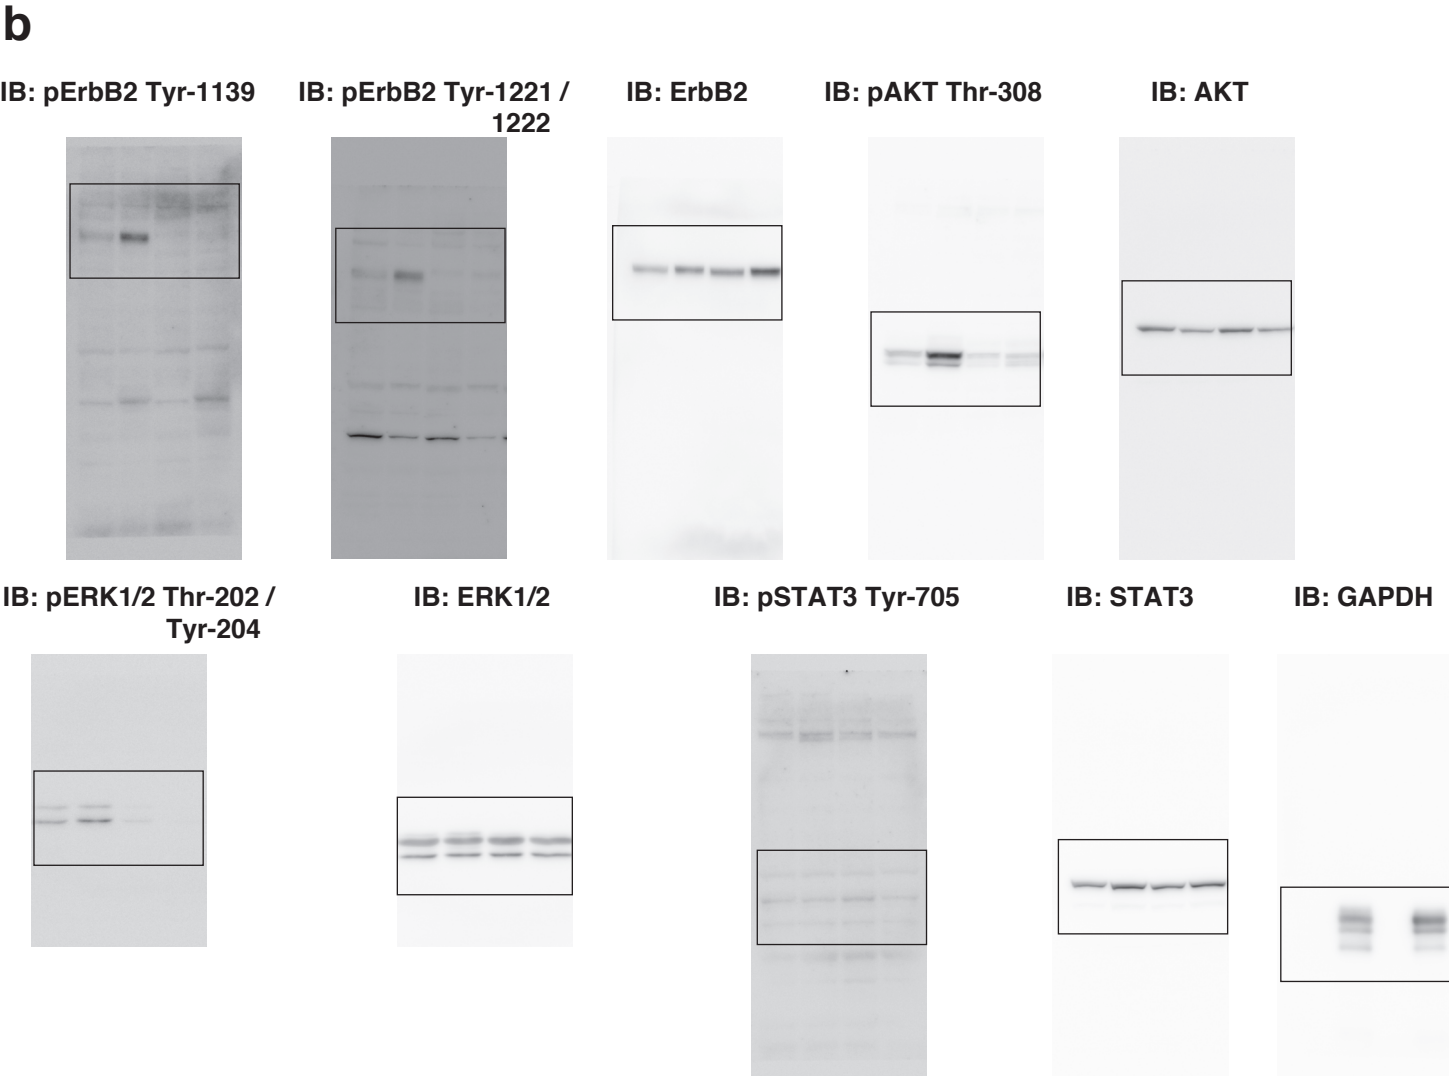

Supplementary Figure 6. Full-length blots of Figure 4a-b. a-b full-length blots of Figure 4a-b, respectively. Boxed regions were cropped and shown as the figure.



# Supplementary Figure 7

IB: pAKT Thr-308

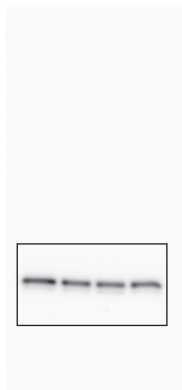

IB: AKT

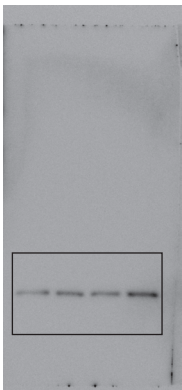

IB: pERK1/2 Thr-202 / Tyr-204

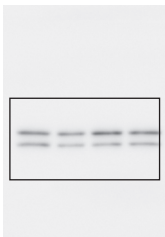

IB: ERK1/2

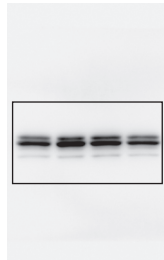

IB: pSTAT3 Tyr-705

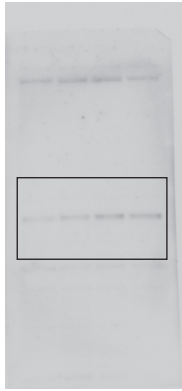

IB: STAT3

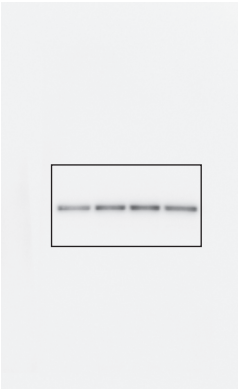

IB: Nectin-4

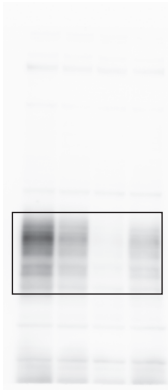

IB: GAPDH

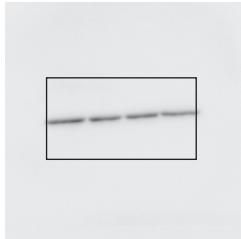

Supplementary Figure 7. Full-length blots of Figure 4c. full-length blots of Figure 4c in this manuscript. Boxed regions were cropped and shown as the figure.

# Supplementary Figure 8

**a**

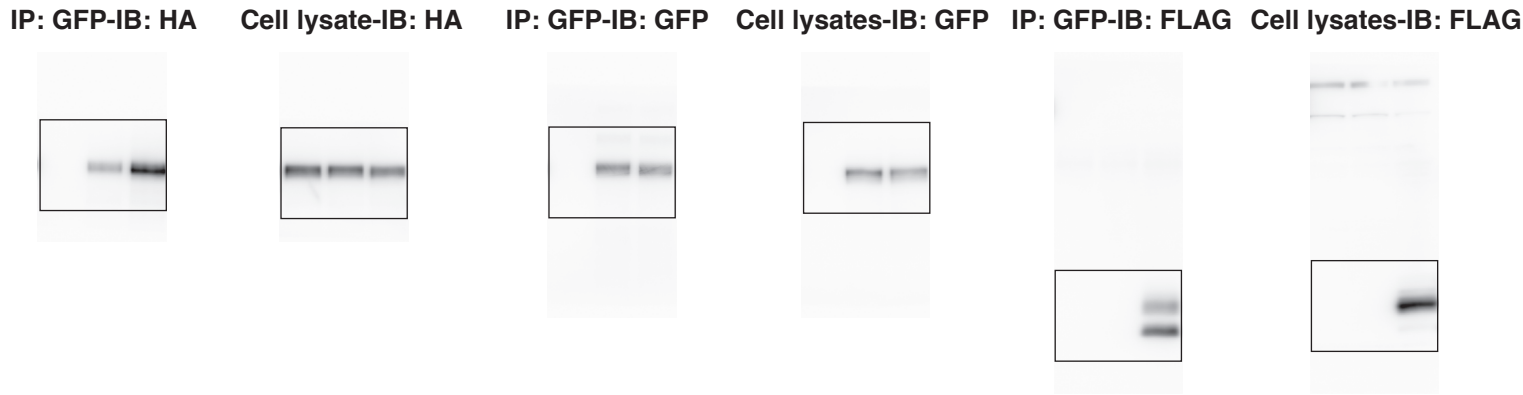

**b**

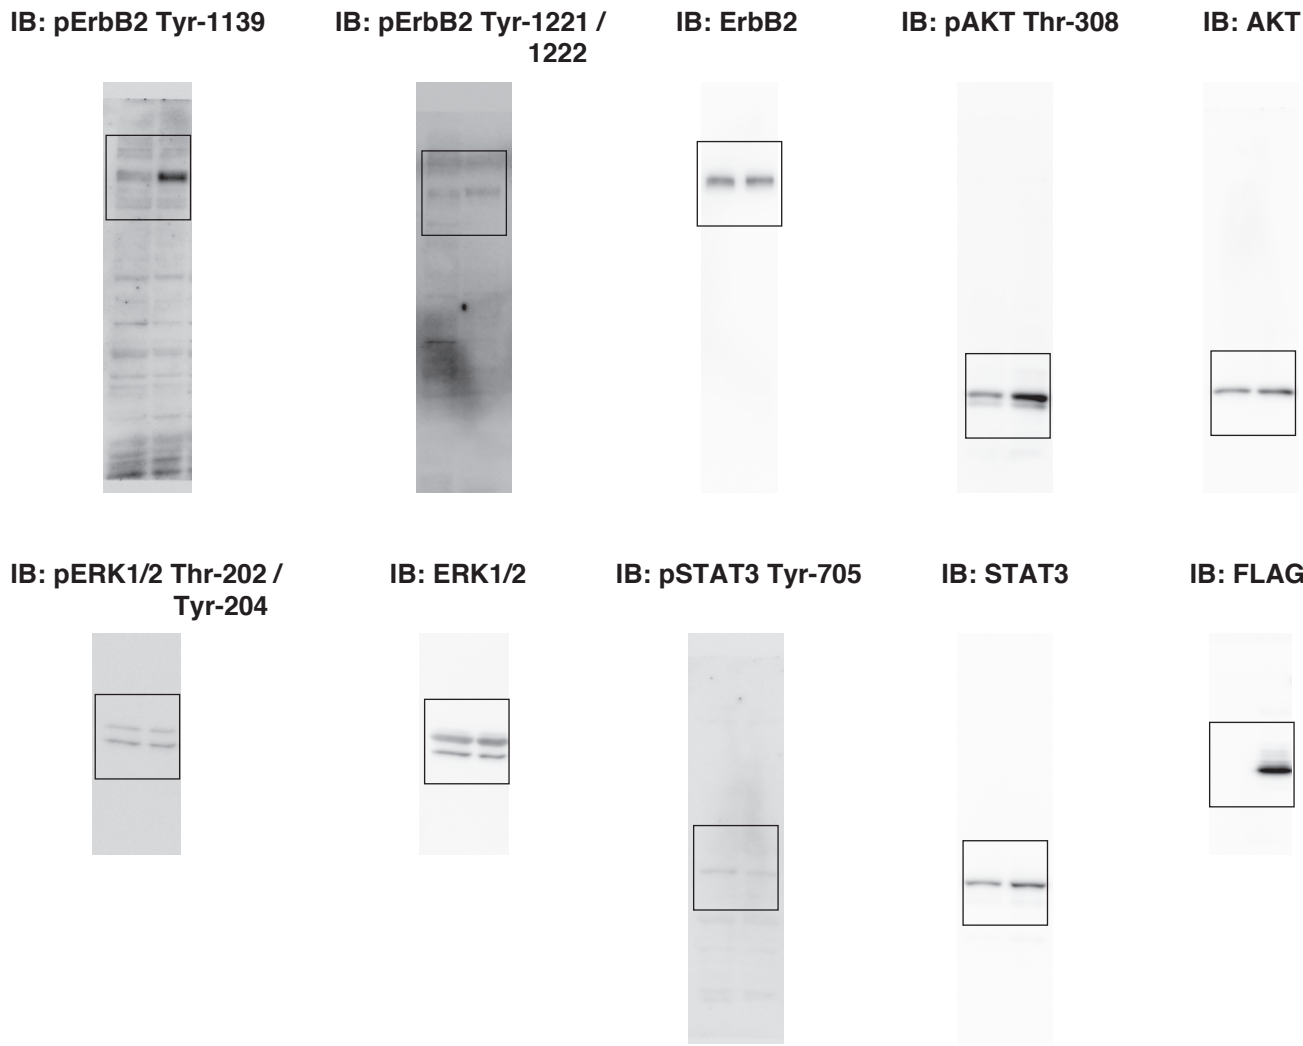

**Supplementary Figure 8. Full-length blots of Figure 6. a-b full-length blots of Figure 6a-b, respectively. Boxed regions were cropped and shown as the figure.**

# Supplementary Figure 9

**a**

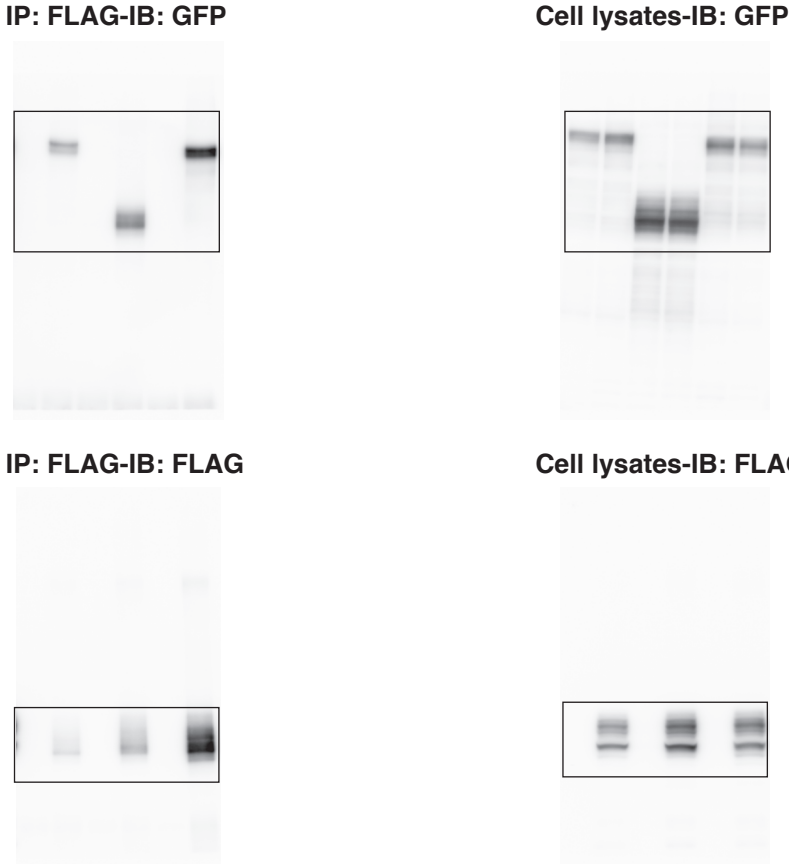

**b**

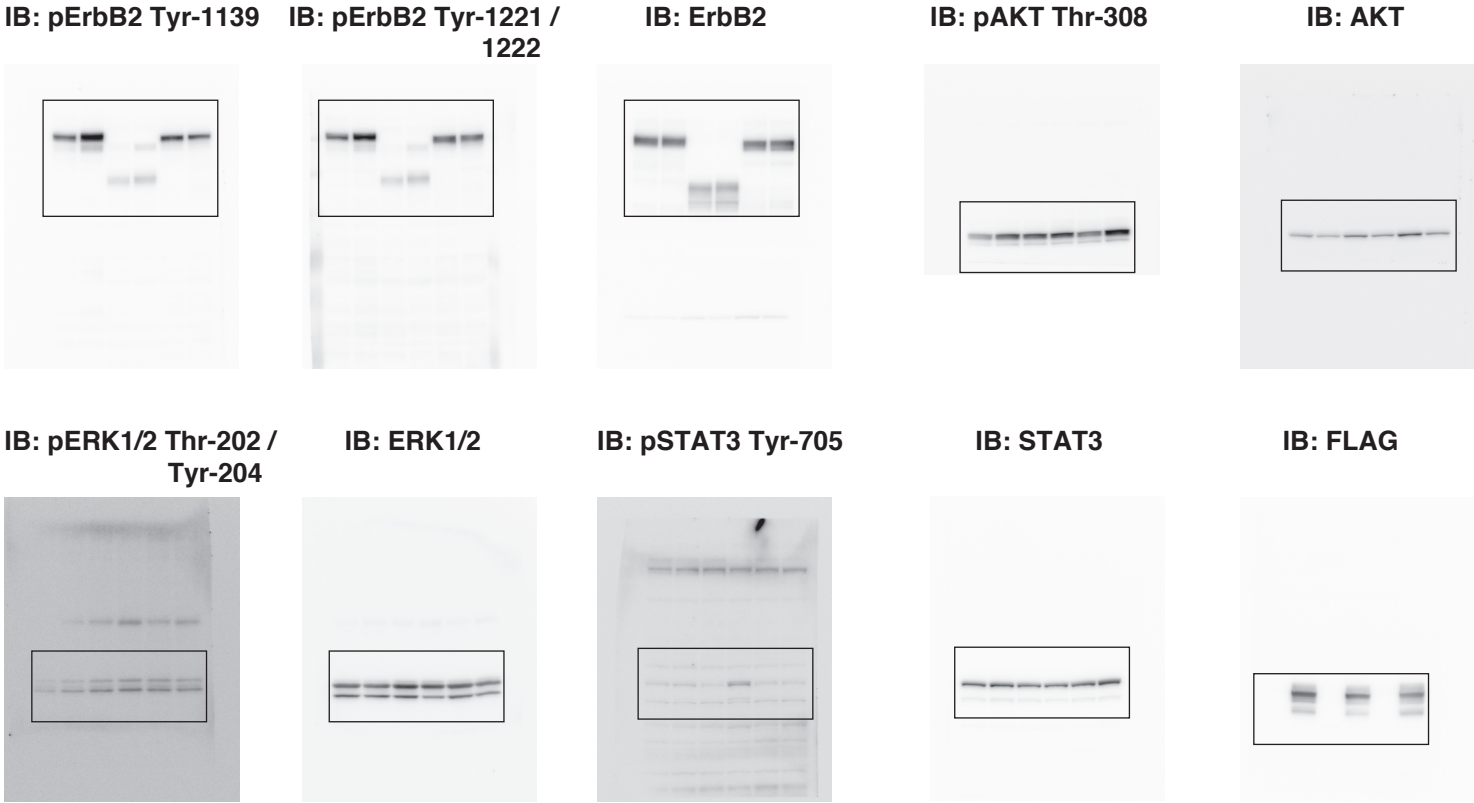

**Supplementary Figure 9. Full-length blots of Figure 7. a** full-length blots of Figure 7b in this manuscript. Boxed regions were cropped and shown as the figure. **b** full-length blots of Figure 7c in this manuscript. Boxed regions were cropped and shown as the figure.

# Supplementary Figure 10

**a**

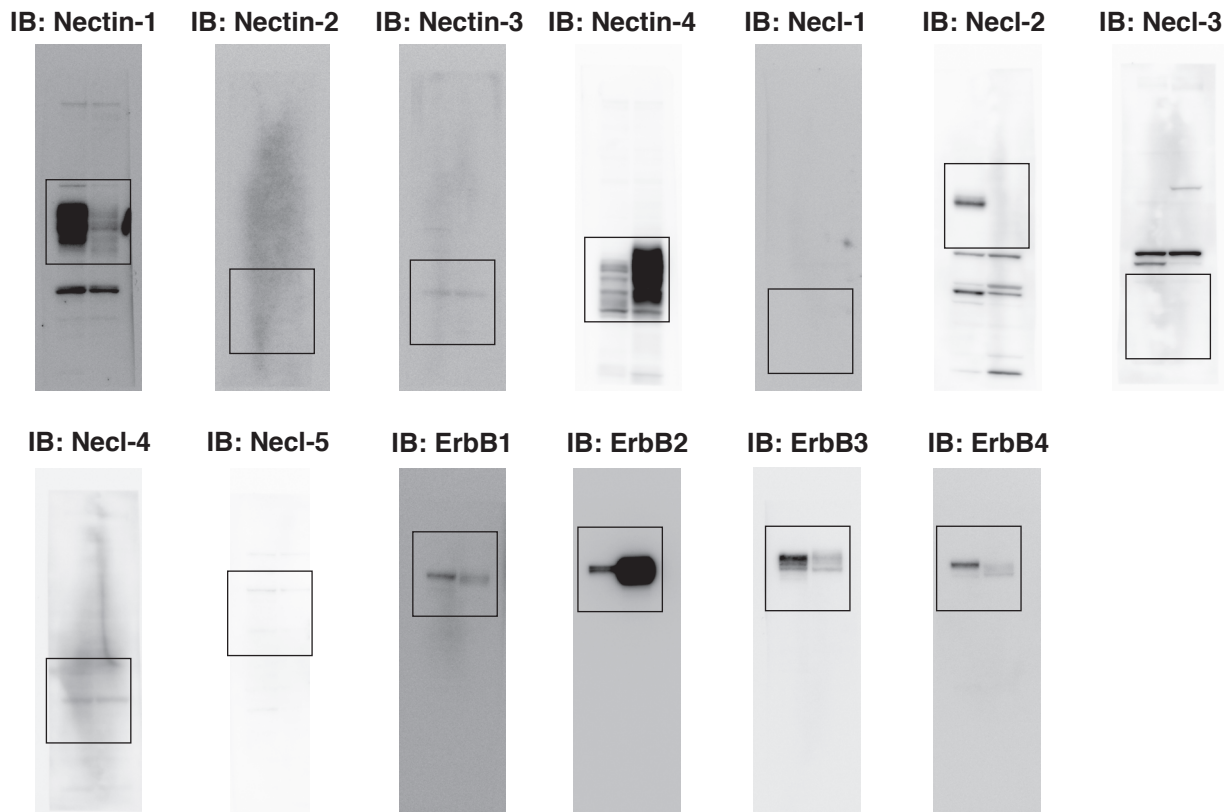

**b**

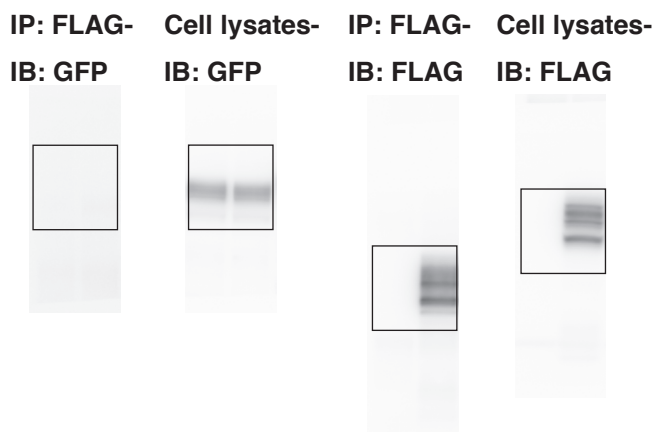

**c**

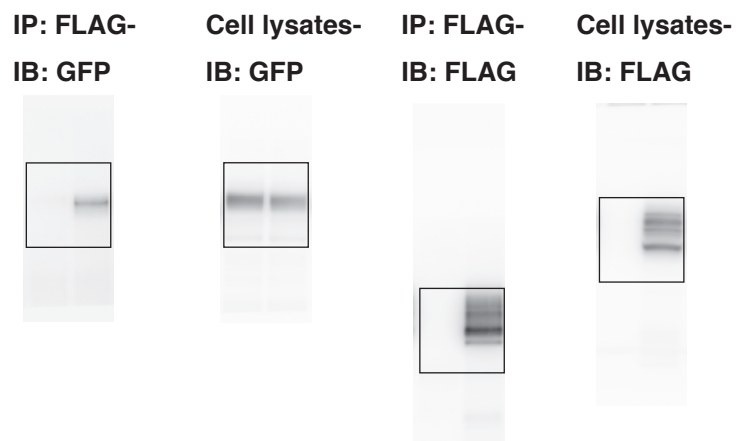

**d**

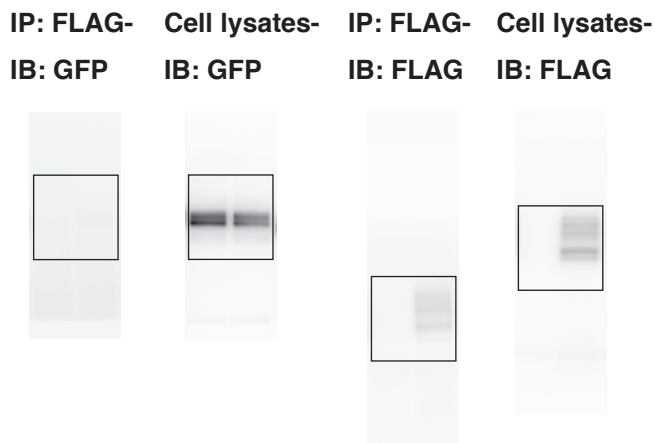

**e**

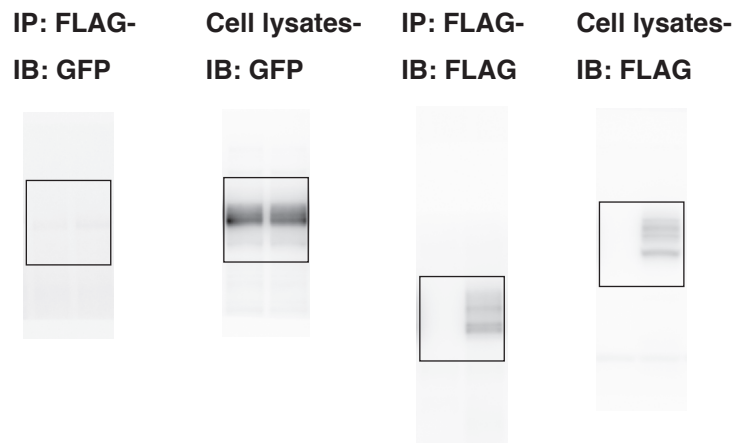

**Supplementary Figure 9. Full-length blots of Supplementary Figure 1. a-e full-length blots of Supplementary Figure 1a-e, respectively. Boxed regions were cropped and shown as the figure.**

# Supplementary Figure 11

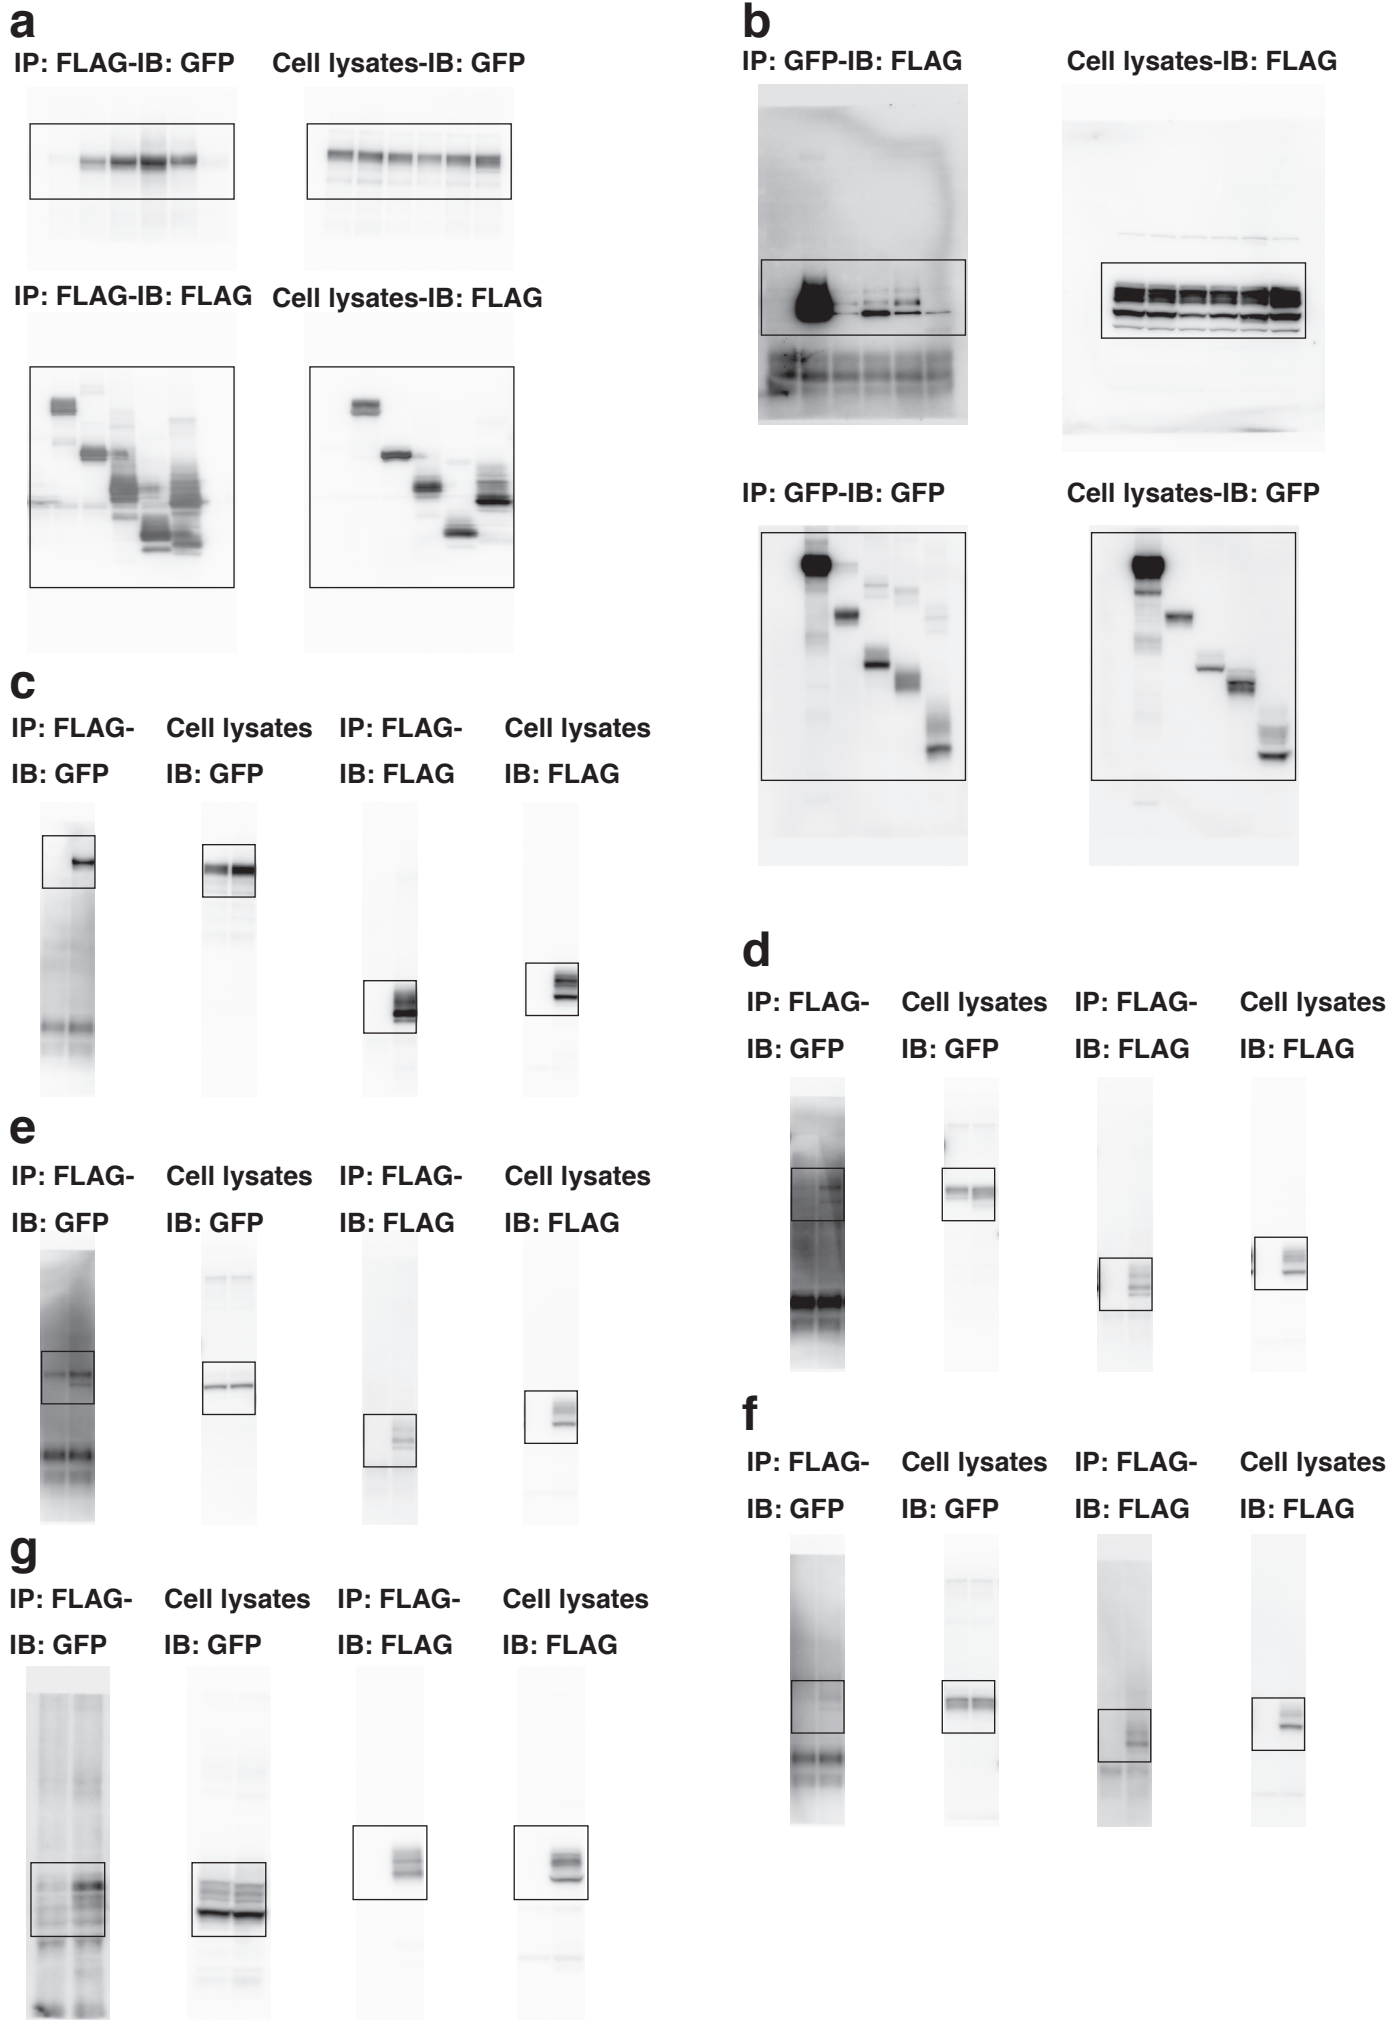

**Supplementary Figure 11. Full-length blots of Supplementary Figure 2. a-g full-length blots of Supplementary Figure 2b-h. Each of the full-length blots are compatible with Supplementary Figure 2, respectively in a way of off-by-one. Boxed regions were cropped and shown as the figure.**

# Supplementary Figure 12

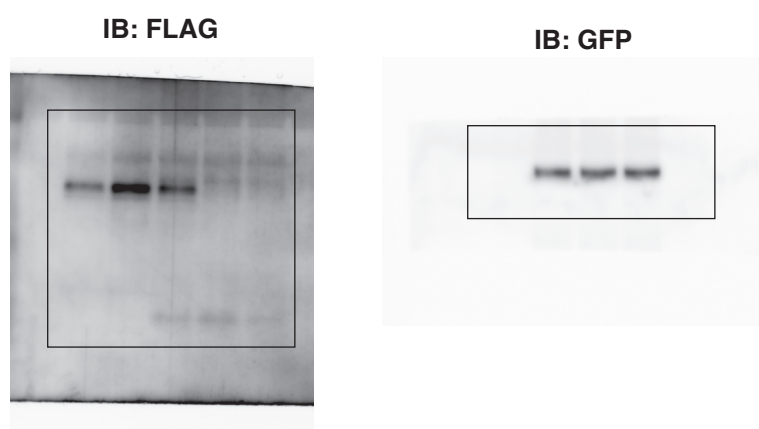

**Supplementary Figure 12. Full-length blots of Supplementary Figure 3.** full-length blots of Supplementary Figure 3e in this manuscript. Boxed regions were cropped and shown as the figure.

# Supplementary Table 1

| Reagent                                           | Experiment                     | Supplier                       | Address            | Catalogue number |
|---------------------------------------------------|--------------------------------|--------------------------------|--------------------|------------------|
| <b>Cell culture and transfection</b>              |                                |                                |                    |                  |
| Amaxa Cell Line Nucleofector Kit V                | Transfection for T47D          | Lonza                          | Allendale, NJ, USA | VCA-1003         |
| Apo-transferrin                                   | Supplements for SUM190-PT      | Sigma-Aldrich                  | St. Louis, MO, USA | T2252            |
| Blasticidin                                       | Stable expression for ErbB2    | Wako Pure Chemical Corporation | Osaka, Jpan        | 029-18701        |
| Ethanolamine                                      | Supplements for SUM190-PT      | Sigma-Aldrich                  | St. Louis, MO, USA | E0135            |
| Fatty acid-free BSA                               | Cell culture                   | Sigma-Aldrich                  | St. Louis, MO, USA | A8806            |
| HEPES                                             | Supplements for SUM190-PT      | Nacalai Tesque                 | Kyoto, Japan       | 15639-84         |
| Hydrocortisone                                    | Supplements for SUM190-PT      | Sigma-Aldrich                  | St. Louis, MO, USA | H4001            |
| Insulin                                           | Cell culture                   | Sigma-Aldrich                  | St. Louis, MO, USA | I9278            |
| Irbinitinib                                       | DNA synthesis and WB           | Selleck Chemicals              | Houston, TX, USA   | S8362            |
| Lipofectamine 3000                                | Transfection for HEK293E       | Thermo Fisher Scientific       | Waltham, MA, USA   | L3000075         |
| LY294002                                          | DNA synthesis                  | Calbiochem                     | Billerica, MA, USA | 440202           |
| Puromycin                                         | Stable expression for Nectin-4 | Wako Pure Chemical Corporation | Osaka, Jpan        | 166-23153        |
| Ruxolitinib                                       | DNA synthesis                  | Selleck Chemicals              | Houston, TX, USA   | S1378            |
| Serum-free media                                  | Protein purification           | SAFC Biosciences Inc.          | Lenexa, KS, USA    | 24571C           |
| Sodium selenite                                   | Supplements for SUM190-PT      | Sigma-Aldrich                  | St. Louis, MO, USA | S9133            |
| Triiodo thyronine                                 | Supplements for SUM190-PT      | Sigma-Aldrich                  | St. Louis, MO, USA | T5516            |
| U0126                                             | DNA synthesis                  | Calbiochem                     | Billerica, MA, USA | 662005           |
| Wortmannin                                        | DNA synthesis                  | Calbiochem                     | Billerica, MA, USA | 681675           |
| Xfect MicroRNA Transfection Reagent               | Transfection for siRNA         | Takara Bio                     | Kusatsu, Japan     | 631435           |
| <b>Co-immunoprecipitation and WB</b>              |                                |                                |                    |                  |
| Accutase                                          | Co-immunoprecipitation         | Nacalai Tesque                 | Kyoto, Japan       | 12679-54         |
| Protease inhibitor cocktail (cOmplete, EDTA-free) | Co-immunoprecipitation and WB  | Roche Diagnostics GmbH         | Mannheim, Germany  | 11836170001      |
| Phosphatase Inhibitor Cocktail 2                  | Co-immunoprecipitation and WB  | Sigma-Aldrich                  | St. Louis, MO, USA | P5726            |
| Phosphatase Inhibitor Cocktail 3                  | Co-immunoprecipitation and WB  | Sigma-Aldrich                  | St. Louis, MO, USA | P0044            |
| Dynabeads protein A                               | Co-immunoprecipitation         | Thermo Fisher Scientific       | Waltham, MA, USA   | DB10002          |
| Dynabeads protein G                               | Co-immunoprecipitation         | Thermo Fisher Scientific       | Waltham, MA, USA   | DB10004          |
| Block Ace                                         | WB                             | KAC                            | Kyoto, Japan       | UKB80            |
| Can Get Signal Solution 1                         | WB                             | Toyobo                         | Osaka, Japan       | NKB-201          |
| Can Get Signal Solution 2                         | WB                             | Toyobo                         | Osaka, Japan       | NKB-301          |
| Immobilon Western Chemiluminescent HRP Substrate  | WB                             | Merck Millipore                | Billerica, MA, USA | WBKLS0500        |
| <b>Protein purification</b>                       |                                |                                |                    |                  |
| DDDDK-antibody-conjugated beads                   | Protein purification           | MBL International              | Nagoya, Japan      | 3328             |
| DDDDK-tag peptide                                 | Protein purification           | MBL International              | Nagoya, Japan      | 3325-205         |

**Supplementary Table 1. The list of the reagents used in this study.** WB, western blotting; HRP, horseradish peroxidase.

# Supplementary Table 2

| Antibody                       | Experiment | Dilution                              | Buffer for IB or IF        | Host   | Clone      | Clone number | Supplier                      | Address              | Catalogue number                  |
|--------------------------------|------------|---------------------------------------|----------------------------|--------|------------|--------------|-------------------------------|----------------------|-----------------------------------|
| <b>Primary antibody</b>        |            |                                       |                            |        |            |              |                               |                      |                                   |
| AKT                            | IB         | 1 / 1000                              | Block Ace                  | Rabbit | Polyclone  | -            | Cell Signaling Technology     | Danvers, MA, USA     | 9272                              |
| Phospho-AKT (Thr308)           | IB         | 1 / 5000                              | Can Get                    | Rabbit | Polyclone  | -            | Cell Signaling Technology     | Danvers, MA, USA     | 9275                              |
| DDDDK                          | IF         | 1 / 1000                              | PBS with 3% BSA            | Mouse  | Monoclonal | FLA-1        | MBL International             | Nagoya, Japan        | M185                              |
| DDDDK-HRP                      | IB         | 1 / 10000                             | Can Get                    | Mouse  | Monoclonal | FLA-1        | MBL International             | Nagoya, Japan        | M185-7                            |
| ErbB1                          | IB         | 1 / 500                               | Block Ace                  | Mouse  | Monoclonal | 6F1          | MBL International             | Nagoya, Japan        | MI-12-1                           |
| ErbB2                          | IB, IF     | IB: 1 / 1000, IF: 1 / 100             | Block Ace, PBS with 3% BSA | Rabbit | Monoclonal | 29D8         | Cell Signaling Technology     | Danvers, MA, USA     | 2165                              |
| ErbB2-HRP                      | IB         | 1 / 5000                              | Can Get                    | Rabbit | Monoclonal | 29D8         | Cell Signaling Technology     | Danvers, MA, USA     | 603888                            |
| Phospho-ErbB2 (Tyr1139)        | IB         | 1 / 5000                              | Can Get                    | Rabbit | Monoclonal | EP1046Y      | Abcam                         | Cambridge, UK        | ab53290                           |
| Phospho-ErbB2 (Tyr1221/1222)   | IB         | 1 / 5000                              | Can Get                    | Rabbit | Monoclonal | 6B12         | Cell Signaling Technology     | Danvers, MA, USA     | 2243                              |
| ErbB3                          | IB         | 1 / 1000                              | Block Ace                  | Rabbit | Monoclonal | D22C5        | Cell Signaling Technology     | Danvers, MA, USA     | 12708                             |
| ErbB4                          | IB         | 1 / 1000                              | Block Ace                  | Rabbit | Monoclonal | 111B2        | Cell Signaling Technology     | Danvers, MA, USA     | 4795                              |
| ERK1/2                         | IB         | 1 / 1000                              | Block Ace                  | Rabbit | Polyclone  | -            | Cell Signaling Technology     | Danvers, MA, USA     | 9102                              |
| Phospho-ERK1/2 (Thr202/Tyr204) | IB         | 1 / 2000                              | Block Ace                  | Rabbit | Monoclonal | D13.14.4E    | Cell Signaling Technology     | Danvers, MA, USA     | 4370                              |
| FLAG                           | IB         | 1 / 1000                              | Block Ace                  | Mouse  | Monoclonal | M2           | Sigma-Aldrich                 | St. Louis, MO, USA   | F3165                             |
| FLAG                           | IB, IP     | IB: 1 / 1000, IP: 1 / 100             | Block Ace                  | Rabbit | Polyclone  | -            | Sigma-Aldrich                 | St. Louis, MO, USA   | F7425                             |
| GAPDH                          | IB         | 1 / 1000                              | Block Ace                  | Rabbit | Monoclonal | 14C10        | Cell Signaling Technology     | Danvers, MA, USA     | 2118                              |
| GFP                            | IB, IP     | IB: 1 / 1000, IP: 1 / 100             | Block Ace                  | Rabbit | Polyclone  | -            | MBL International             | Nagoya, Japan        | 598                               |
| HA                             | IB         | 1 / 1000                              | Block Ace                  | Mouse  | Monoclonal | 16B12        | BioLegend                     | San Diego, CA, USA   | MMS-101P                          |
| Nectin-1                       | IB         | 1 / 500                               | Block Ace                  | Rabbit | Polyclone  | -            | Santa Cruz Biotechnology Inc. | Santa Cruz, CA, USA  | SC-28639                          |
| Nectin-2                       | IB         | 1 / 500                               | Block Ace                  | Rat    | Monoclonal | 502-57       | MBL International             | Nagoya, Japan        | D083-3                            |
| Nectin-3                       | IB         | 1 / 500                               | Block Ace                  | Rabbit | Polyclone  | -            | Santa Cruz Biotechnology Inc. | Santa Cruz, CA, USA  | SC-14806                          |
| Nectin-4                       | IB, IF, IP | IB: 1 / 1000, IF: 1 / 100, IP: 1 / 50 | Block Ace, PBS with 3% BSA | Goat   | Polyclone  | -            | R&D Systems, Inc.             | Minneapolis, MN, USA | AF2659                            |
| Necl-1                         | IB         | 1 / 500                               | Block Ace                  | Rabbit | Polyclone  | -            | -                             | -                    | Referred in Materials and methods |
| Necl-2                         | IB         | 1 / 500                               | Block Ace                  | Rabbit | Polyclone  | -            | -                             | -                    | Referred in Materials and methods |
| Necl-3                         | IB         | 1 / 500                               | Block Ace                  | Rabbit | Polyclone  | -            | -                             | -                    | Referred in Materials and methods |
| Necl-4                         | IB         | 1 / 1000                              | Block Ace                  | Mouse  | Monoclonal | N244/5       | NeuroMab                      | Davis, CA, USA       | 75-247                            |
| Necl-5                         | IB         | 1 / 1000                              | Block Ace                  | Mouse  | Monoclonal | 300907       | R&D Systems, Inc.             | Minneapolis, MN, USA | MAB25301                          |
| STAT3                          | IB         | 1 / 1000                              | Block Ace                  | Mouse  | Monoclonal | 124H6        | Cell Signaling Technology     | Danvers, MA, USA     | 9139                              |
| Phospho-STAT3 (Tyr705)         | IB         | 1 / 5000                              | Can Get                    | Rabbit | Monoclonal | D3A7         | Cell Signaling Technology     | Danvers, MA, USA     | 9145                              |
| <b>Secondary antibody</b>      |            |                                       |                            |        |            |              |                               |                      |                                   |
| Mouse IgG-HRP                  | IB         | 1 / 10000                             | Block Ace                  | Sheep  | Polyclone  | -            | GE Healthcare                 | Little Chalfont, UK  | NA931                             |
| Rabbit IgG-HRP                 | IB         | 1 / 10000                             | Block Ace or Can Get       | Donkey | Polyclone  | -            | GE Healthcare                 | Little Chalfont, UK  | NA934                             |
| Rat IgG-HRP                    | IB         | 1 / 10000                             | Block Ace                  | Goat   | Polyclone  | -            | GE Healthcare                 | Little Chalfont, UK  | NA935                             |
| Goat IgG-HRP                   | IB         | 1 / 10000                             | Block Ace                  | Donkey | Polyclone  | -            | Santa Cruz Biotechnology Inc. | Santa Cruz, CA, USA  | sc-2020                           |
| Rabbit IgG-Alexa Fluor 488     | IF         | 1 / 200                               | PBS with 3% BSA            | Donkey | Polyclone  | -            | Abcam                         | Cambridge, UK        | ab150130                          |
| Goat IgG-Alexa Fluor 555       | IF         | 1 / 200                               | PBS with 3% BSA            | Donkey | Polyclone  | -            | Abcam                         | Cambridge, UK        | ab150073                          |
| Mouse IgG-Alexa Fluor 555      | IF         | 1 / 2000                              | PBS with 3% BSA            | Goat   | Polyclone  | -            | Thermo Fisher Scientific      | Waltham, MA, USA     | A21424                            |

**Supplementary Table 2. The list of antibodies used in this study.** IB, immunoblotting; IF, immunofluorescence; IP, immunoprecipitation. HRP, horseradish peroxidase; Can Get, Canget Signal Solution.



# Supplementary Table 3

| siRNA       | Sequence                  | Supplier                 | address          | catalogue number |
|-------------|---------------------------|--------------------------|------------------|------------------|
| Nectin-4 #1 | 5'-GGCCUGCUGCAUGUACAUA-3' | Thermo Fisher Scientific | Waltham, MA, USA | s37689           |
| Nectin-4 #2 | 5'-ACUGACUGCUUGACCUUA-3'  | Thermo Fisher Scientific | Waltham, MA, USA | s37690           |
| Nectin-4 #3 | 5'-AGAUGACCCAGAAUAUGA-3'  | Thermo Fisher Scientific | Waltham, MA, USA | s37691           |

**Supplementary Table 3. The list of siRNA sequences used in this study.**

## Supplementary Methods

### Cell culture and transfection

HEK293E cells were maintained in Dulbecco's modified Eagle's medium supplemented with 10% fetal bovine serum (FBS) at 37°C in 5% CO<sub>2</sub>. Human mammary ductal carcinoma T47D cells were maintained in RPMI-1640 supplemented with 10% FBS and 10 µg/ml insulin and cultured at 37°C in 5% CO<sub>2</sub>. Human basal breast epithelial carcinoma SUM190-PT cells were purchased from Asterand Bioscience (Detroit, MI, USA) and were maintained in Ham's F-12 supplemented with 0.1% fatty acid-free BSA, 5 mM ethanolamine, 10 mM HEPES at pH 7.5, 1 µg/ml hydrocortisone, 5 µg/ml insulin, 50 nM sodium selenite, 5 µg/ml apo-transferrin, 10 nM triiodo thyronine, and 2% FBS, and cultured at 37°C in 5% CO<sub>2</sub>. For the transient expression of various constructs, Lipofectamine 3000 was used for HEK293E cells according to the manufacturer's protocol. For stable expression of nectin-4 and ErbB2 in T47D cells, electroporation was carried out using Amaxa Cell Line Nucleofector Kit V according to the manufacturer's protocol.

### Plasmid construction

The following cDNAs were kindly provided: human *ERBB1* and *ERBB2* from Dr. T. Yamamoto (Okinawa Institute of Science and Technology Graduate University, Japan) and human *ERBB3* and *ERBB4* from Dr. S. Higashiyama (Ehime University, Japan). To obtain p95-ErbB2, ErbB2ΔEx16, and various mutants of the extracellular region of ErbB2, in which the cytoplasmic region (deletion of the signalling peptide and the

cytoplasmic region, corresponding to amino acids (aa) 1–22 and 720–1255, respectively), the cytoplasmic region and domain I (deletion of the signalling peptide, domain I, and the cytoplasmic region, corresponding to aa 1–22, 23–193, and 720–1255, respectively), the cytoplasmic region and domains I and II (deletion of the signalling peptide, domains I and II, and the cytoplasmic region, corresponding to aa 1–22, 23–313, and 720–1255, respectively), or the cytoplasmic region and domains I, II, and III (deletion of the signalling peptide, domains I, II, and III, and the cytoplasmic region, corresponding to aa 1–22, 23–509, and 720–1255, respectively) were deleted, each cDNA fragment was amplified by PCR and inserted into pEGFP-N3 vector (Clontech, Mountain View, CA, USA). Preprotrypsin signal peptide was inserted into the plasmids of all the ErbB2 mutants at the N-terminus. pFLAG-CMV1-Nectin-4 and the various mutants of nectin-4 were prepared as described [44]. For the stable expression of FLAG-tagged nectin-4 and FLAG-tagged nectin-4-Ig3-TM, the cDNA was introduced into the pCAGI-Puro vector. For the stable expression of GFP-tagged ErbB2, p95-ErbB2, and ErbB2 $\Delta$ Ex16, the cDNA fragments were amplified by PCR and introduced into pEF-BOS-IRES-blasticidin vector that was constructed by insertion of IRES-blasticidin sequence obtained from pCX4-BSR vector into pEF-BOS vector<sup>67</sup>. For the stable expression of recombinant FLAG-tagged nectin-4 Ig1/2/3 (deletion of the signalling peptide and the cytoplasmic region, corresponding to aa 1–29 and 343–508 respectively) and FLAG-tagged nectin-4-Ig3 (deletion of the signalling peptide, the first and second Ig-like domains and the cytoplasmic region, corresponding to aa 1–29, 30–239, and 343–508, respectively), the cDNA fragments were introduced into the

pCAGI-Puro vector.

### **Co-immunoprecipitation assay and Western blotting**

SUM190-PT or HEK293E cells co-transfected with various combinations of the indicated plasmids were cultured at 37°C for 48 h. The cells were washed with PBS and detached with Accutase. The detached cells were additionally cultured in suspension with Ham's F12 containing the supplements or Dulbecco's modified Eagle's medium containing 10% FBS for 1 h. The cells were collected by centrifugation, washed with ice-cold PBS, and lysed with a lysis buffer (20 mM Tris-HCl at pH 7.5, 1% Nonidet P-40, 10% glycerol, 150 mM NaCl, 1 mM DTT, 1 mM CaCl<sub>2</sub>, 1 mM MgCl<sub>2</sub>, 1 mM 4-(2-aminoethyl)benzenesulfonyl fluoride hydrochloride, protease inhibitor cocktail, and Phosphatase Inhibitor Cocktail 2 and 3. The lysates were rotated for 30 min, subjected to centrifugation at 12,000×g for 15 min, and incubated with anti-FLAG mAb, anti-nectin-4 pAb, or anti-GFP pAb-conjugated Protein A or Protein G Dynabeads at room temperature for 15 min. After the beads were extensively washed with the lysis buffer, bound proteins were eluted by heating at 80°C in an SDS sample buffer (67 mM Tris-HCl at pH 6.8, 2% SDS, 100 mM DTT, 5% sucrose, and 0.005% bromophenol blue) for 2 min, and subjected to SDS-PAGE, followed by Western blotting. The samples separated on SDS-PAGE were transferred to polyvinylidene difluoride membranes (Merck Millipore, Billerica, MA, USA). After being blocked with Block Ace in Tris-buffered saline plus 0.05% Tween 20, the membranes were incubated with the indicated Abs using Can Get Signal Solution 1. After being washed three times with

Tris-buffered saline plus 0.05% Tween 20, the membranes were incubated with horseradish peroxidase-conjugated anti-goat, anti-mouse, anti-rabbit, or anti-rat IgG Ab using Can Get Signal Solution 2. The signals for the proteins were detected using Immobilon Western Chemiluminescent HRP Substrate. The intensity of the bands in Western blotting was calculated using ImageJ 1.48v 32-bit software.

### **Immunofluorescence microscopy**

Confocal images were acquired using a LSM510 META confocal laser-scanning microscope (Carl Zeiss, Jena, Germany) with  $\alpha$  Plan-FLUAR 100 $\times$ /1.45 oil objective lens in 2048  $\times$  2048 pixels. The displayed images were applied into maximum signal intensity projection from around 20 confocal images collected at a 0.2  $\mu$ m step along the z-axis at room temperature.

### **Protein purification**

The reagents for the purification of recombinant proteins are shown in supplementary table 1. FLAG-tagged nectin-4 Ig1/2/3 and the third Ig-like domain of nectin-4, HEK293E cells were transfected with the indicated plasmids. After selection of the transfected cells by puromycin, the cells were cultured in serum-free media. The secreted FLAG-tagged nectin-4 proteins were purified from the conditioned media by DDDDK-Ab-conjugated beads. The DDDDK-peptide-eluted nectin-4 proteins were ultrafiltered several times for dialysis and concentrated using an Amicon Ultra-4 Centrifugal Filter Unit (nominal molecular weight limit 3 kDa, Merck Millipore).

## **Supplementary Reference**

67. Mizushima S, Nagata S. pEF-BOS, a powerful mammalian expression vector. *Nucleic Acids Res.* 1990; 18:5322.
